# Supplementary material for: Exploring the spatial and temporal dimension of yellow stem borer in coastal rice ecosystem for enhanced management using geostatistical analysis
Source: Research Square preprint supplement (doi:10.21203/rs.3.rs-5287037/v1), 2024-10-31
Supplement: Supplementary file 1 [file 0a4a61191a05284a62dc8e53.docx]

**Supplementary Table 3:** **Spatial distribution of yellow stem borer damage in rice represented by variogram models’ parameters**

| **Year** | **Month** | **YSB Damage (%)** | | | | | | |
| --- | --- | --- | --- | --- | --- | --- | --- | --- |
| **Model** | **Range** | **Nugget (C0)** | **Sill (C)** | **C0/C0+C** | **r2** | **RMSE** |
| 2021 | August | Spherical | 901.38 | 0.0003 | 0.0013 | 0.1875 | 0.645 | 0.040 |
| Gaussian | 553.98 | 0.0000 | 0.0014 | 0.0000 | 0.752 | 0.039 |
| Exponential | 284.98 | 0.0000 | 0.0014 | 0.0000 | 0.714 | 0.039 |
| September | Spherical | 901.38 | 0.0002 | 0.0009 | 0.1818 | 0.352 | 0.029 |
| Gaussian | 326.64 | 0.0007 | 2.9013 | 0.0002 | 0.359 | 0.029 |
| Exponential | 575.44 | 0.0007 | 0.0052 | 0.1186 | 0.198 | 0.028 |
| October | Spherical | 901.38 | 0.0005 | 0.0027 | 0.1563 | 0.472 | 0.053 |
| Gaussian | 720.50 | 0.0000 | 0.0024 | 0.0000 | 0.156 | 0.049 |
| Exponential | 503.00 | 0.0000 | 0.0024 | 0.0000 | 0.168 | 0.050 |
| November | Spherical | 901.38 | 0.0003 | 0.0015 | 0.1667 | 0.382 | 0.039 |
| Gaussian | 658.63 | 0.0015 | 0.3670 | 0.0041 | 0.382 | 0.039 |
| Exponential | 170.69 | 0.0013 | 0.0012 | 0.5200 | 0.277 | 0.039 |
| 2022 | August | Spherical | 901.38 | 0.0003 | 0.0014 | 0.1765 | 0.178 | 0.038 |
| Gaussian | 949.21 | 0.0000 | 0.0013 | 0.0000 | 0.369 | 0.033 |
| Exponential | 901.38 | 0.0014 | 0.0021 | 0.0625 | 0.178 | 0.038 |
| September | Spherical | 901.38 | 0.0012 | 0.0056 | 0.1765 | 0.280 | 0.078 |
| Gaussian | 116.26 | 0.0041 | 0.0011 | 0.7885 | 0.260 | 0.078 |
| Exponential | 936.45 | 0.0031 | 0.0022 | 0.5849 | 0.350 | 0.078 |
| October | Spherical | 901.38 | 0.0000 | 0.0001 | 0.0000 | 0.130 | 0.019 |
| Gaussian | 716.43 | 0.0004 | 0.2747 | 0.0015 | 0.450 | 0.019 |
| Exponential | 664.09 | 0.0001 | 0.0001 | 0.5000 | 0.260 | 0.019 |
| November | Spherical | 901.38 | 0.0011 | 0.0051 | 0.1774 | 0.190 | 0.068 |
| Gaussian | 840.92 | 0.0000 | 0.0050 | 0.0000 | 0.640 | 0.066 |
| Exponential | 829.54 | 0.0000 | 0.0052 | 0.0000 | 0.240 | 0.066 |
| 2023 | August | Spherical | 901.38 | 0.0007 | 0.0033 | 0.1750 | 0.142 | 0.054 |
| Gaussian | 571.31 | 0.0000 | 0.0031 | 0.0000 | 0.173 | 0.053 |
| Exponential | 467.52 | 0.0000 | 0.0031 | 0.0000 | 0.184 | 0.531 |
| September | Spherical | 901.38 | 0.0004 | 0.0024 | 0.1429 | 0.169 | 0.045 |
| Gaussian | 521.99 | 0.0030 | 0.1174 | 0.0249 | 0.169 | 0.045 |
| Exponential | 128.76 | 0.0017 | 0.0040 | 0.2982 | 0.190 | 0.043 |
| October | Spherical | 901.38 | 0.0012 | 0.0050 | 0.1935 | 0.140 | 0.077 |
| Gaussian | 625.65 | 0.0071 | 0.1706 | 0.0400 | 0.140 | 0.077 |
| Exponential | 154.73 | 0.0047 | 0.0056 | 0.4563 | 0.320 | 0.076 |
| November | Spherical | 901.38 | 0.0003 | 0.0022 | 0.1200 | 0.413 | 0.052 |
| Gaussian | 315.57 | 0.0000 | 0.0031 | 0.0000 | 0.413 | 0.052 |
| Exponential | 901.38 | 0.0032 | 0.0651 | 0.0468 | 0.413 | 0.052 |
