# Supplementary material for: Exploring the spatial and temporal dimension of yellow stem borer in coastal rice ecosystem for enhanced management using geostatistical analysis
Source: Research Square preprint supplement (doi:10.21203/rs.3.rs-5287037/v1), 2024-10-31
Supplement: Supplementary file 2 [file 361fbb555a96e13f35c52746.docx]

**Supplementary Table 2:** Spatial distribution of yellow stem borer population in rice represented by variogram models’ parameters

| **Year** | **Month** | **YSB Pheromone Trap Catches (number/trap)** | | | | | | |
| --- | --- | --- | --- | --- | --- | --- | --- | --- |
| **Model** | **Range** | **Nugget (C0)** | **Sill (C)** | **C0/C0+C** | **r2** | **RMSE** |
| 2021 | August | Spherical | 901.38 | 0.0353 | 0.1710 | 0.1711 | 0.724 | 0.425 |
| Gaussian | 494.06 | 0.0000 | 0.1572 | 0.0000 | 0.864 | 0.422 |
| Exponential | 325.24 | 0.0000 | 0.1547 | 0.0000 | 0.921 | 0.420 |
| September | Spherical | 901.39 | 0.0364 | 0.1655 | 0.1803 | 0.427 | 0.384 |
| Gaussian | 356.30 | 0.1066 | 0.1043 | 0.5054 | 0.561 | 0.348 |
| Exponential | 197.85 | 0.1000 | 4.4189 | 0.0221 | 0.482 | 0.348 |
| October | Spherical | 901.38 | 0.0316 | 0.1576 | 0.1670 | 0.241 | 0.374 |
| Gaussian | 705.48 | 0.0000 | 0.1321 | 0.0000 | 0.246 | 0.361 |
| Exponential | 361.14 | 0.0000 | 0.1323 | 0.0000 | 0.421 | 0.370 |
| November | Spherical | 901.38 | 0.0587 | 0.2823 | 0.1721 | 0.764 | 0.499 |
| Gaussian | 155.58 | 0.2131 | 0.0264 | 0.8898 | 0.852 | 0.505 |
| Exponential | 242.67 | 0.2063 | 0.0409 | 0.8345 | 0.103 | 0.507 |
| 2022 | August | Spherical | 901.38 | 0.0190 | 0.0922 | 0.1709 | 0.204 | 0.326 |
| Gaussian | 211.32 | 0.0511 | 0.0402 | 0.5597 | 0.368 | 0.289 |
| Exponential | 444.93 | 0.0403 | 0.0936 | 0.3010 | 0.326 | 0.299 |
| September | Spherical | 901.38 | 0.1213 | 0.5422 | 0.1828 | 0.100 | 0.763 |
| Gaussian | 141.43 | 0.4049 | 0.1012 | 0.8000 | 0.216 | 0.741 |
| Exponential | 161.07 | 0.3414 | 0.1889 | 0.6438 | 0.340 | 0.732 |
| October | Spherical | 901.38 | 0.0670 | 0.3098 | 0.1778 | 0.746 | 0.507 |
| Gaussian | 831.62 | 0.0000 | 0.2904 | 0.0000 | 0.275 | 0.443 |
| Exponential | 590.93 | 0.0000 | 0.2930 | 0.0000 | 0.183 | 0.471 |
| November | Spherical | 901.39 | 0.0681 | 0.3168 | 0.1769 | 0.746 | 0.525 |
| Gaussian | 138.53 | 0.2513 | 0.0359 | 0.8750 | 0.763 | 0.524 |
| Exponential | 808.12 | 0.2229 | 0.0637 | 0.7777 | 0.736 | 0.525 |
| 2023 | August | Spherical | 901.38 | 0.0494 | 0.2103 | 0.1902 | 0.133 | 0.451 |
| Gaussian | 637.88 | 0.0000 | 0.2146 | 0.0000 | 0.207 | 0.428 |
| Exponential | 629.91 | 0.0000 | 0.2180 | 0.0000 | 0.223 | 0.424 |
| September | Spherical | 901.38 | 0.0352 | 0.2974 | 0.1058 | 0.104 | 0.578 |
| Gaussian | 507.83 | 0.0000 | 0.2528 | 0.0000 | 0.736 | 0.571 |
| Exponential | 655.54 | 0.2439 | 0.0584 | 0.8068 | 0.503 | 0.568 |
| October | Spherical | 901.38 | 0.0528 | 0.2186 | 0.1945 | 0.896 | 0.486 |
| Gaussian | 708.34 | 0.2418 | 0.4484 | 0.3503 | 0.896 | 0.486 |
| Exponential | 314.40 | 0.1940 | 0.5354 | 0.2660 | 0.134 | 0.470 |
| November | Spherical | 901.38 | 0.0465 | 0.2264 | 0.1704 | 0.284 | 0.463 |
| Gaussian | 479.60 | 0.3518 | 0.9269 | 0.2751 | 0.284 | 0.463 |
| Exponential | 111.52 | 0.1813 | 0.2821 | 0.3912 | 0.269 | 0.471 |
