# Supplementary material for: Exploring the spatial and temporal dimension of yellow stem borer in coastal rice ecosystem for enhanced management using geostatistical analysis
Source: Research Square preprint supplement (doi:10.21203/rs.3.rs-5287037/v1), 2024-10-31
Supplement: Supplementary file 3 [file 790e5753cf653afb7b3a570f.docx]

**Supplementary Table 1:** Sampling locations and their coordinates

| **Location** | **Acronym** | **Latitude (N)** | **Longitude (E)** |
| --- | --- | --- | --- |
| Kalingapeta | L1 | 18.41192 | 83.91742 |
| Gadalavanipeta | L2 | 18.4029 | 83.91727 |
| Chittivalasa | L3 | 18.42983 | 83.92718 |
| Navanambadu | L4 | 18.4208 | 83.92703 |
| Gollapeta | L5 | 18.41178 | 83.92688 |
| Kasimvalasa | L6 | 18.40275 | 83.92672 |
| Bhyrivanipeta | L7 | 18.39372 | 83.92657 |
| Chevukalupeta | L8 | 18.42968 | 83.93664 |
| Sriramvalasa | L9 | 18.42066 | 83.93648 |
| Ponnam | L10 | 18.41163 | 83.93633 |
| Ponnam | L11 | 18.4026 | 83.93618 |
| Venkatapuram | L12 | 18.39358 | 83.93603 |
| Bhyrivanipeta | L13 | 18.38455 | 83.93587 |
| Ponnam | L14 | 18.41148 | 83.94579 |
| Ponnam | L15 | 18.40246 | 83.94563 |
| Challavanipeta | L16 | 18.39343 | 83.94548 |
| RCRRS Farm | L17 | 18.38441 | 83.94533 |
| Alikam | L18 | 18.37538 | 83.94517 |
| Batteru | L19 | 18.40231 | 83.95509 |
| Naira | L20 | 18.39328 | 83.95494 |
| Karimillipeta | L21 | 18.38426 | 83.95478 |
| Karimillipeta | L22 | 18.37523 | 83.95463 |
| Ronanki | L23 | 18.38411 | 83.96424 |
| Ronanki | L24 | 18.37509 | 83.96408 |
| Bhirinagulapeta | L25 | 18.36606 | 83.96393 |
| Karajada | L26 | 18.37494 | 83.97353 |
| Singupuram | L27 | 18.36591 | 83.97338 |
| Karajada | L28 | 18.37479 | 83.98299 |
| Bhyri | L29 | 18.36576 | 83.98283 |
| Bhyri | L30 | 18.35674 | 83.98268 |
| Booravilli | L31 | 18.36562 | 83.99229 |
| Booravilli | L32 | 18.35659 | 83.99213 |
