# Supplementary material for: Exploring the spatial and temporal dimension of yellow stem borer in coastal rice ecosystem for enhanced management using geostatistical analysis
Source: Research Square preprint supplement (doi:10.21203/rs.3.rs-5287037/v1), 2024-10-31
Supplement: Supplementary file 4 [file 9df4be3b12f6929278a68e10.docx]

**Supplementary Table 4:** Identification of hotspots for yellow stem borer population and damage

| **Year** | **Month** | **Hot spot Locations** | |
| --- | --- | --- | --- |
| **YSB Population** | **YSB Damage** |
| 2021 | August | L31 | L29, L31 |
| September | Nil | Nil |
| October | L28 | L18, L28, L29 |
| November | Nil | L30 |
| 2022 | August | L27, L29, L30 | Nil |
| September | Nil | Nil |
| October | L32 | L32 |
| November | L28 | Nil |
| 2023 | August | L27 | L16, L26, L27 |
| September | Nil | Nil |
| October | Nil | L28 |
| November | L27 | L27, L29, L30 |
